# Supplementary material for: fuel relay - soldering - TIPS? - bust - how about tests?
Source: Royal Society of Chemistry journal article supplement (doi:10.1039/c5sc02488a), 2011-10-20
Supplement: c5sc02488a1.pdf [file c5sc02488a1.pdf]

Supplementary for

**Structural basis of head to head polyketide fusion by CorB**

Georg Zocher,<sup>a,#</sup> Joachim Vilstrup,<sup>b,#</sup> Daniel Heine,<sup>c</sup> Asis Hallab,<sup>d</sup> Emilie Goralski,<sup>e</sup> Christian Hertweck,<sup>c,f</sup> Mark Stahl,<sup>g</sup> Till F. Schäberle<sup>e\*</sup> and Thilo Stehle<sup>a,h\*</sup>

<sup>a</sup> Interfaculty Institute of Biochemistry, University Tübingen, Hoppe-Seyler-Str. 4, 72076 Tübingen, Germany.

<sup>b</sup> Department of Molecular Biology and Genetics, Aarhus University, Gustav Wieds Vej 10C, DK 8000 Aarhus C, Denmark.

<sup>c</sup> Leibniz Institute for Natural Product Research and Infection Biology (HKI), 07745 Jena, Germany.

<sup>d</sup> Max Planck Institute for Plant Breeding Research, Carl-von-Linné-Weg 10, 50829 Köln, Germany.

<sup>e</sup> Institute for Pharmaceutical Biology, University of Bonn, Nussallee 6, 53115 Bonn, Germany.

<sup>f</sup> Chair for Natural Product Chemistry, Friedrich Schiller University, 07737 Jena, Germany.

<sup>g</sup> Center for Plant Molecular Biology, University Tübingen, Auf der Morgenstelle 1, 72076 Tübingen, Germany.

<sup>h</sup> Department of Pediatrics, Vanderbilt University School of Medicine, Nashville, TN 37232, USA.

# Authors contributed equally to this work

\* To whom correspondence should be addressed:

For structural biology: Thilo Stehle, Interfaculty Institute of Biochemistry, University Tübingen, Hoppe-Seyler-Str. 4, 72076 Tübingen, Germany, Tel.: +49-7071-2973043; Fax: +49-7071-295565; E-mail: [thilo.stehle@uni-tuebingen.de](mailto:thilo.stehle@uni-tuebingen.de), and for biochemistry Till Schäberle, Institute for Pharmaceutical Biology, University of Bonn, Nussallee 6, 53115 Bonn, Germany, Tel.: +49 228 73 2676; E-mail: [till.schaeberle@uni-bonn.de](mailto:till.schaeberle@uni-bonn.de)

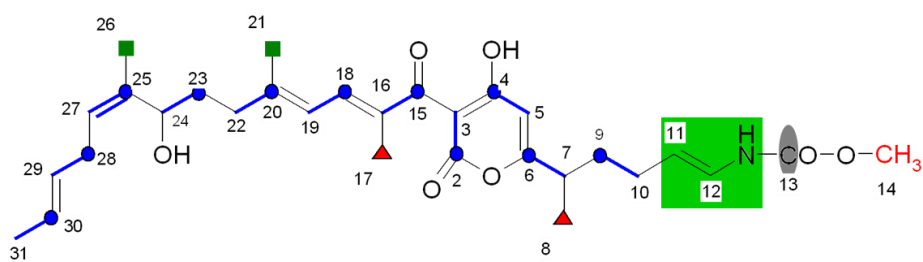

-  C-1 Acetate-building block
-  Methionine derived
-  Acetate derived
-  Glycine derived
-  Sodium bicarbonate derived

**Figure S1.** Result of the feeding experiments with labelled precursors

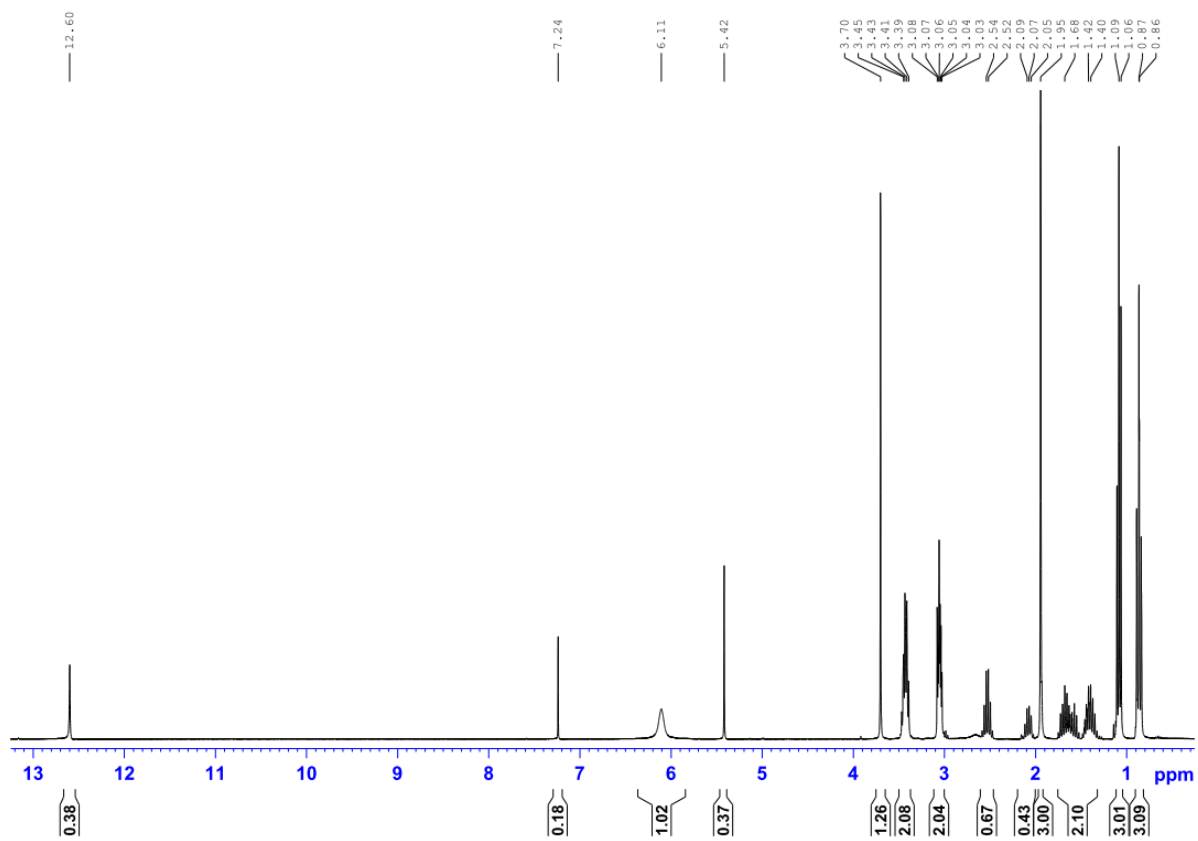

**Figure S2**  $^1\text{H}$  NMR ( $\text{CDCl}_3$ , 300 MHz) of substrate mimic **1**

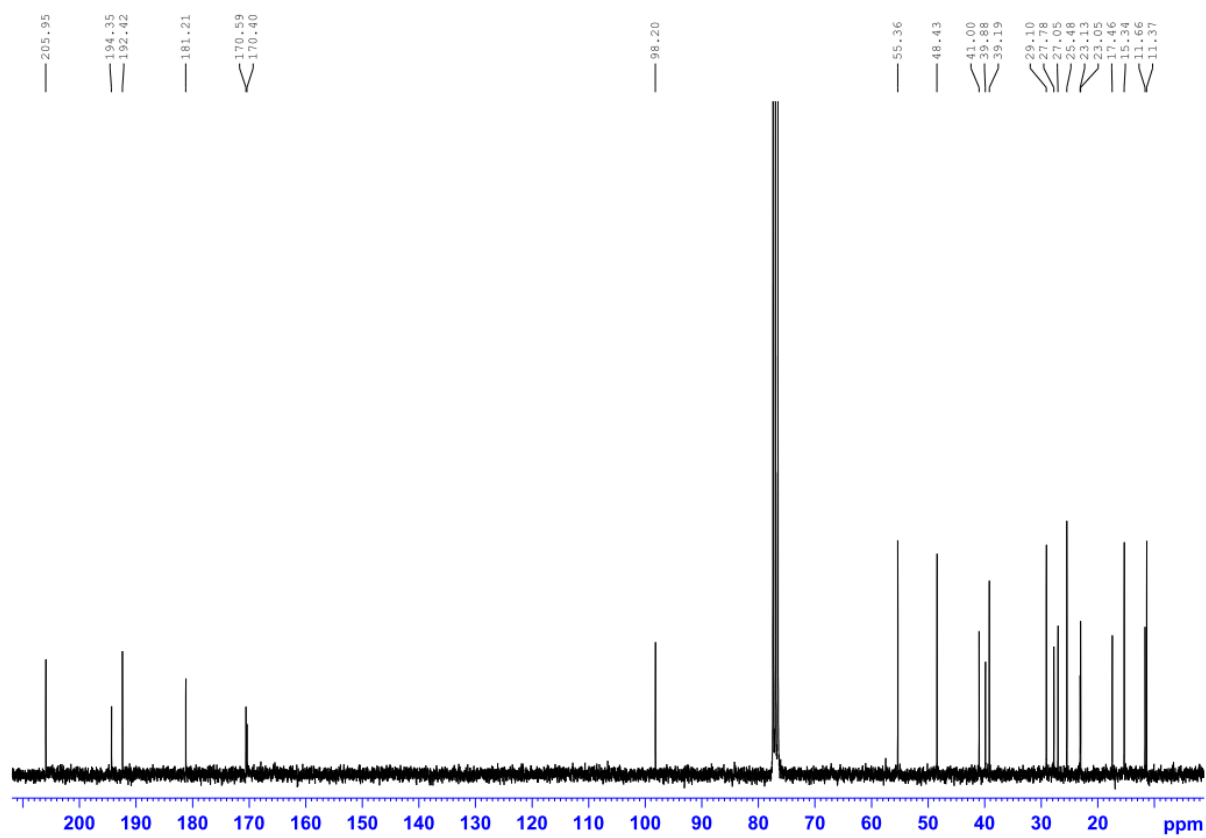

**Figure S3**  $^{13}\text{C}$  NMR ( $\text{CDCl}_3$ , 75 MHz) of substrate mimic **1**

| <b>KS</b> | <b>Box1</b> | <b>Box2</b> | <b>Box3</b> | <b>Box4</b> |
|-----------|-------------|-------------|-------------|-------------|
| #1        | CASSL       | EAHGTG      | NIGH        |             |
| #2        | CSSSL       | ETHGTG      | NIGH        |             |
| #3        | CSSSL       | EAHGTG      | NVGH        |             |
| #4        | CSSSL       | EAHGTG      | NIGH        |             |
| #5        | CSASL       | ECAAAG      | NVGH        |             |
| #6        | CSSSL       | ETHGTG      | NIGH        |             |
| #7        | CASSL       | EAHGTG      | NIGH        |             |
| #8        | CSSSL       | ECHGTG      | NIGH        |             |
| #9        | CSSSL       | EAHGTG      | NAGH        |             |
| #10       | CSSSL       | EAHGTG      | NIGH        |             |
| #11       | CSSSL       | EAHGSG      | NTGH        |             |
| #12       | CSSSL       | EAHGTG      | NIGH        |             |
| #13       | CSSSL       | EAHGTG      | NIGH        |             |
| CorB      | CLSFF       | HMNGAE      | VIPH        | ANC         |
| CorD      | SASGN       | NAHGSA      | WTGH        |             |

**Figure S4.** Conserved motifs of ketosynthase (KS) protein(domain)s encoded in the coralopyronin A gene cluster. The here analyzed CorB is boxed in red. CorD is involved in  $\beta$ -branching. KS domain #5 is inactive, due to the incomplete catalytic triad.

**Table S1.** Data collection and refinement statistics.

|                                     | <b>CorB-ox</b>      | <b>CorB-red</b>     | <b>CorB-1</b>       |
|-------------------------------------|---------------------|---------------------|---------------------|
| Wavelength [Å]                      | 1.00000             | 1.5418              | 0.91840             |
| Resolution [Å]                      | 30-1.54 (1.58-1.54) | 50-1.70 (1.80-1.70) | 30-1.31 (1.34-1.31) |
| Space group                         | C222(1)             | C222(1)             | C222(1)             |
| Unit cell dimension [Å]             |                     |                     |                     |
| a                                   | 62.9                | 62.7                | 62.7                |
| b                                   | 106.3               | 105.2               | 105.3               |
| c                                   | 104.7               | 104.6               | 104.7               |
| Measured reflections                | 659331 (29700)      | 146340 (22889)      | 840246 (132631)     |
| Unique reflections                  | 52020 (3695)        | 34975 (5725)        | 84188 (13261)       |
| Redundancy                          | 12.7 (8.0)          | 4.2 (4.0)           | 10.0 (10.0)         |
| Completeness [%]                    | 99.7 (97.3)         | 90.3 (92.5)         | 98.3 (99.7)         |
| $I/\sigma(I)$                       | 22.1 (2.1)          | 11.1 (2.9)          | 16.9 (1.9)          |
| CC1/2                               | 100.0 (80.9)        | 99.6 (83.5)         | 99.9 (76.0)         |
| Wilson B [Å <sup>2</sup> ]          | 24.3                | 20.4                | 19.6                |
| No. of Atoms                        |                     |                     |                     |
| Chain A                             | 2541                | 2594                | 2601                |
| Ions/Water                          | 255                 | 317                 | 341                 |
| Average B-Factors [Å <sup>2</sup> ] |                     |                     |                     |
| Chain A                             | 33.8                | 18.8                | 18.3                |
| Ions/Water                          | 39.4                | 27.9                | 28.2                |
| $R_{work}$ [%]                      | 17.7                | 19.7                | 17.5                |
| $R_{free}$ [%]                      | 18.2                | 23.1                | 18.8                |
| Rmsd bond angles [°]                | 1.33                | 0.010               | 1.16                |
| Rmsd bond length [Å]                | 0.008               | 1.231               | 0.007               |
| Ramachandran outliers [%]           | 0.7                 | 0.6                 | 0.6                 |
| Ramachandran favored [%]            | 96.1                | 95.3                | 96.2                |

Values in parentheses are for the highest resolution shell.

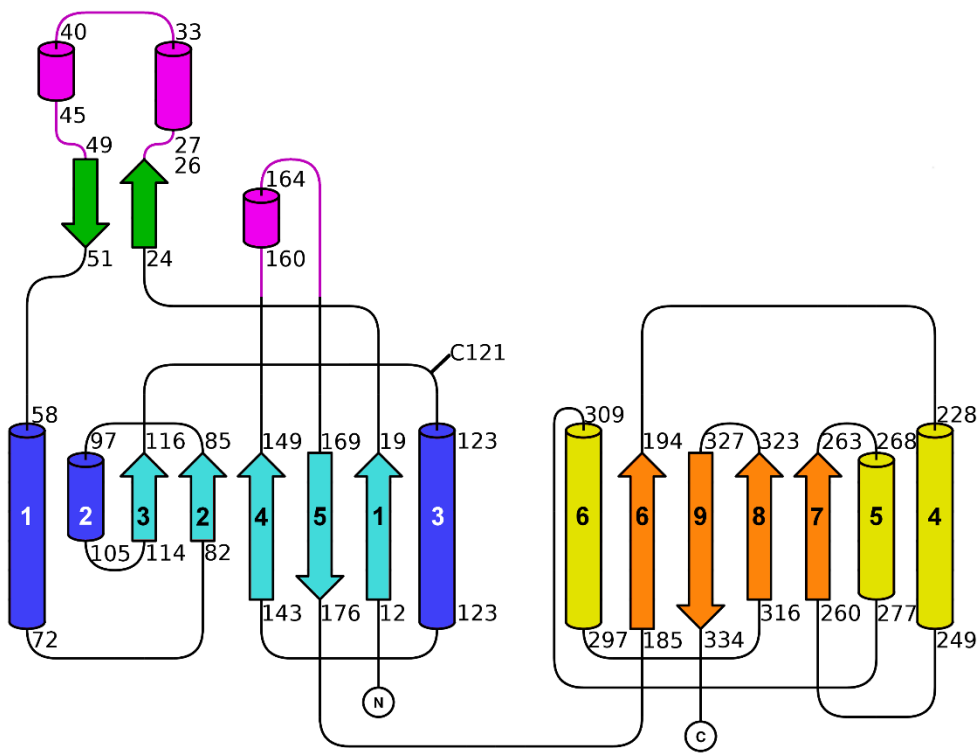

**Figure S5** Topology plot of CorB.

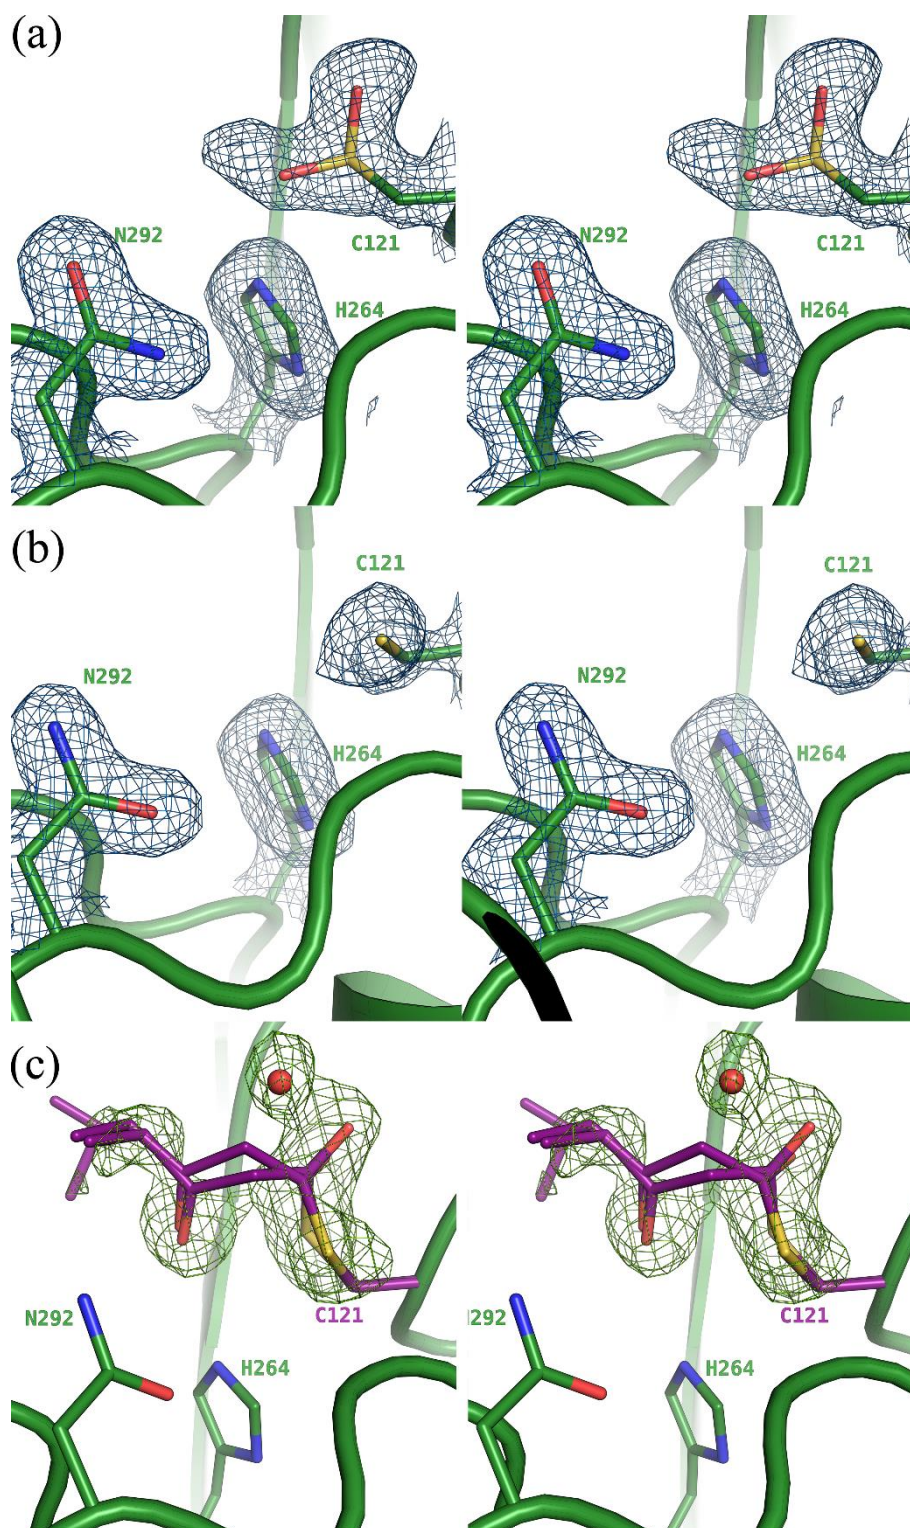

**Figure S6** Stereoview into the active site of CorB for CorB-ox (a) for CorB-red (b) and for CorB-1 after incubation with **1** (c). The  $(2F_o - F_c)$ -electron density map (blue) for CorB-ox and CorB-red is shown at a contour level of 1.5. The substrate mimic **1** (violet) was modeled into the unbiased  $(F_o - F_c)$ -difference electron density map (green) depicted at a contour level of 2.9.



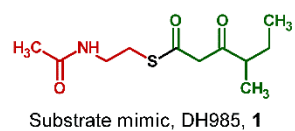

Molecular Formula:  
C<sub>4</sub>H<sub>8</sub>NOS

Molecular Formula:  
C<sub>7</sub>H<sub>11</sub>O<sub>2</sub>

Formula Weight:  
127.2 Da

Molecular Formula:  
C<sub>11</sub>H<sub>19</sub>NO<sub>3</sub>S

Formula Weight:  
245.3 Da

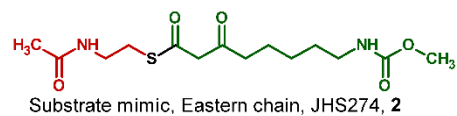

Formula Weight:  
118.2 Da

Molecular Formula:  
C<sub>10</sub>H<sub>16</sub>NO<sub>4</sub>

Formula Weight:  
214.2 Da

Molecular Formula:  
C<sub>14</sub>H<sub>24</sub>N<sub>2</sub>O<sub>5</sub>S

Formula Weight:  
332.4 Da

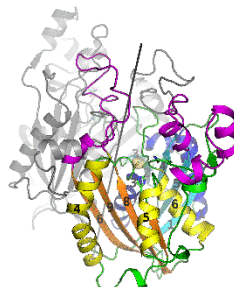

Formula Weight:  
37233.6 Da

**Figure S7** Theoretically expected molecular mass of all molecules used in the ESI-MS experiments.

**Table S2.** Structure comparison using DALI to FabH enzymes from different organisms

| Protein and Source |                                    | PDB entry | Sequence identity [%] | C-rmsd [Å] | # of aligned residues |
|--------------------|------------------------------------|-----------|-----------------------|------------|-----------------------|
| FabH               | <i>Aquifex aeolicus vf5</i>        | 2EBD      | 34                    | 2.1        | 304                   |
| FabH               | <i>Burkholderia Xenovorans</i>     | 4DEF      | 25                    | 2.4        | 322                   |
| FabH               | <i>Vibrio Cholerae</i>             | 4NHD      | 30                    | 2.5        | 313                   |
| FabH               | <i>Escherichia coli</i>            | 1HND      | 31                    | 2.4        | 313                   |
| FabH               | <i>Staphylococcus aureus</i>       | 1ZOW      | 27                    | 2.3        | 307                   |
| FabH               | <i>Xanthomonas oryzae</i>          | 3FK5      | 22                    | 2.3        | 309                   |
| FabH               | <i>Haemophilus influenzae</i>      | 3IL3      | 29                    | 2.7        | 312                   |
| FabH               | <i>Xanthomonas Campestris Olea</i> | 4KTI      | 22                    | 2.4        | 307                   |
| FabH               | <i>Thermus thermophilus hb8</i>    | 1UB7      | 29                    | 2.4        | 310                   |
| FabH               | <i>Mycobacterium tuberculosis</i>  | 2QNX      | 29                    | 2.8        | 318                   |

**Table S3.** Structure comparison using DALI to the closest 12 non-redundant enzymes

| Protein and Source            |                                    | PDB entry | Sequence identity [%] | C-rmsd [Å] | # of aligned residues |
|-------------------------------|------------------------------------|-----------|-----------------------|------------|-----------------------|
| PqsD                          | <i>Pseudomonas aeruginosa paol</i> | 3H77      | 26                    | 2.5        | 305                   |
| PKS11                         | <i>Mycobacterium tuberculosis</i>  | 4JAP      | 22                    | 2.8        | 303                   |
| STEELY1                       | <i>Dictyostelium discoideum</i>    | 2H84      | 19                    | 2.7        | 302                   |
| Pentaketid Synthase           | <i>Neurospora crassa</i>           | 3EU0      | 17                    | 2.9        | 300                   |
| HMG-CoA Synthase              | <i>Brassica juncea</i>             | 2F9A      | 16                    | 2.4        | 300                   |
| Chalcone Synthase 2           | <i>Medicago sativa</i>             | 1U0W      | 22                    | 3.0        | 305                   |
| Pentaketide Chromone Synthase | <i>Aloe arborescens</i>            | 2D3M      | 18                    | 3.0        | 305                   |
| Curcumin Synthase             | <i>Curcuma longa</i>               | 3OV3      | 21                    | 3.0        | 304                   |
| PKS1                          | <i>Ectocarpus siliculosus</i>      | 4B0N      | 17                    | 2.9        | 303                   |
| 2-Pyrone Synthase             | <i>Gerbera hybrid cultivar</i>     | 1EE0      | 20                    | 3.0        | 306                   |
| Stilbene Synthase             | <i>Vitis vinifera</i>              | 3TSY      | 20                    | 3.0        | 305                   |
| Malonyl transferase           | <i>Streptomyces tendae</i>         | 3S3L      | 17                    | 2.9        | 298                   |

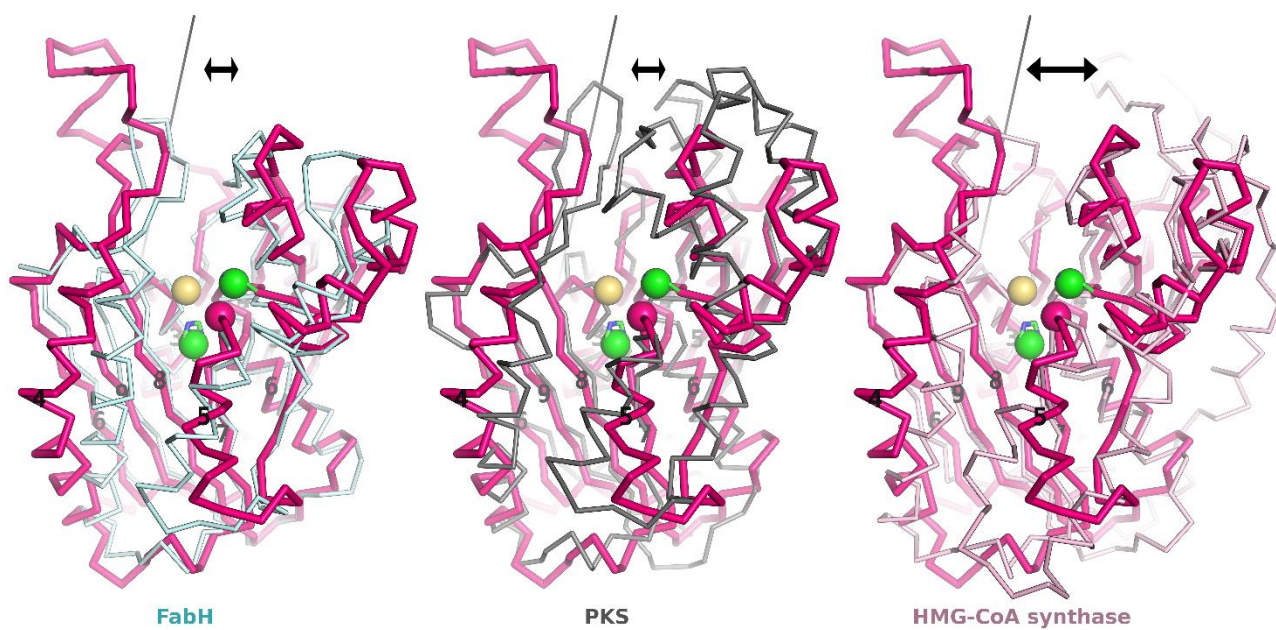

**Figure S8** Structure comparison of CorB with FabH, PKS and HMG-CoA synthase. CorB is shown in pink. The catalytic triad is emphasized by colored spheres.

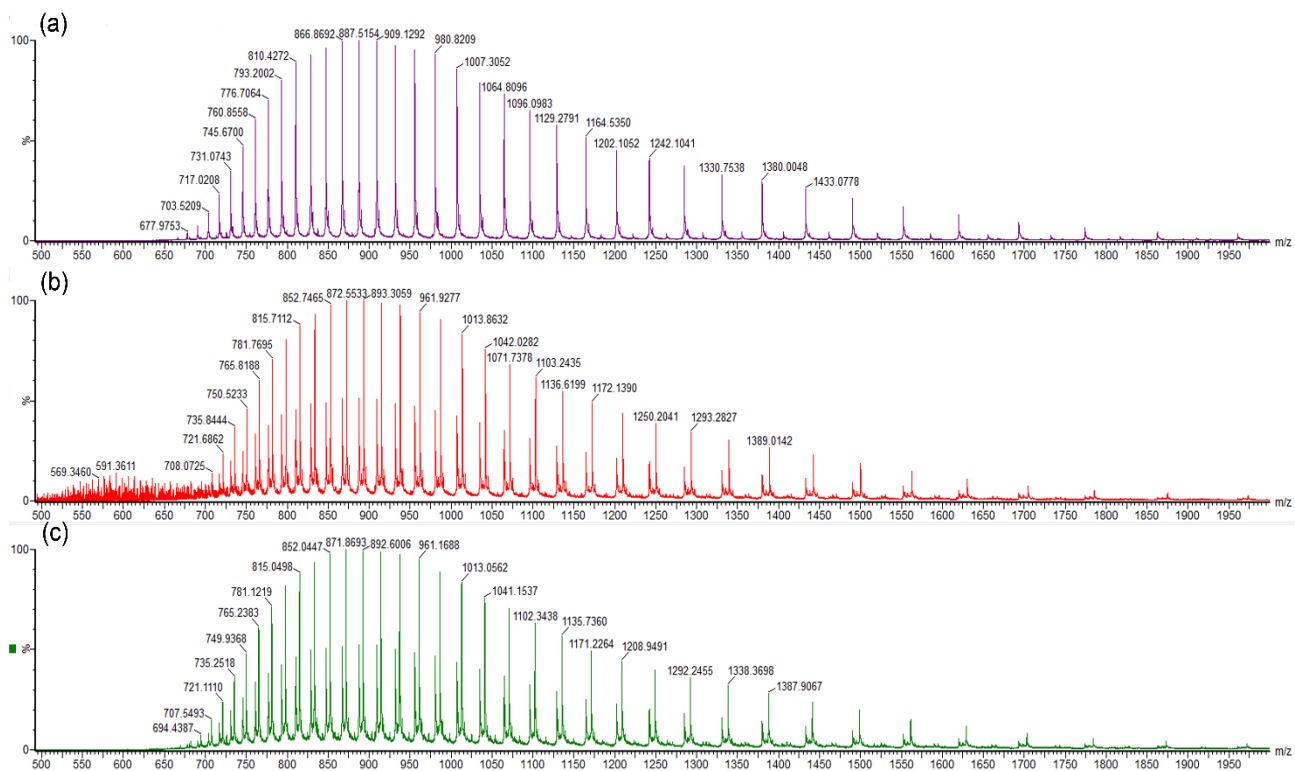

**Figure S9** Complete ESI-MS spectra of (a) CorB, (b) CorB incubated with substrate **1**, and (c) CorB incubated with substrate **2**.

**Table S4.** Oligonucleotides used in this work.

| <b>Gene</b>       | <b>Primer</b> | <b>Sequence 5'-3'</b>                |
|-------------------|---------------|--------------------------------------|
| <i>corB</i>       | CorB_TOPO_up  | CACCATGAATCAGGGTGGTGTCTT             |
|                   | CorB_TOPO_dn  | TCAGTAGGTGAAGACCATTCC                |
| <i>corB_C121A</i> | C121A for     | ATCACCGTCAATGCCTCGGCCCTGAGCTTCTTCGTC |
|                   | C121A rev     | GACGAAGAAGCTCAGGGCCGAGGCATTGACGGTGAT |
| <i>corB_C121S</i> | C121S for     | TGCCGTCAATGCCTCGTCCCTGAGCTTCTTCGTC   |
|                   | C121S rev     | GACGAAGAAGCTCAGGGACGAGGCATTGAC       |
| <i>corB_H264A</i> | H264A for     | GGTACGTCATCCCGGCTCAGCCGAGCCGCGTGG    |
|                   | H264A rev     | CCACGCGGCTCGGCTGAGCCGGGATGACGTACC    |
| <i>corB_H264F</i> | H264F neu f   | GGTACGTCATCCCGTTTCAGCCGAGCCGCGTGG    |
|                   | H264F neu r   | CCACGCGGCTCGGCTGAAACGGGATGACGTACC    |
| <i>corB_N292A</i> | N292A for     | ATCGACCGGTTTCGCCGCCTGCATCGGCGCCTCC   |
|                   | N292A rev     | GGAGGCGCCGATGCAGGCGGCGAACCGGTC       |

**Table S5.** Strains and plasmids used in this work.

| <b>Plasmid / Strain</b>                 | <b>Genotype</b>                                                                                                                                                                             | <b>Reference</b>  |
|-----------------------------------------|---------------------------------------------------------------------------------------------------------------------------------------------------------------------------------------------|-------------------|
| <i>Corallocooccus coralloides</i> B035  | Wild type                                                                                                                                                                                   | Erol et al., 2010 |
| <i>Escherichia coli</i> One Shot®TOP10  | F <sup>-</sup> <i>mcrA</i> Δ( <i>mrr-hsdRMS-mcrBC</i> ) Φ80 <i>lacZ</i> ΔM15<br>Δ <i>lacX74 recA1 araD139 Δ(ara-leu)7697 galU galK</i><br><i>rpsL</i> (Str <sup>R</sup> ) <i>endA1 nupG</i> | Invitrogen        |
| <i>Escherichia coli</i> BL21 (DE3) Star | F <sup>-</sup> <i>ompT hsdS<sub>B</sub></i> (r <sub>B</sub> <sup>-</sup> m <sub>B</sub> <sup>-</sup> ) <i>gal dcm rne131</i> (DE3)                                                          | Invitrogen        |
| pET151TOPO                              | N-terminal 6xHis tag, TEV protease cleavage site                                                                                                                                            | Invitrogen        |
| pET151TOPO+CorB                         | <i>corB</i>                                                                                                                                                                                 | this work         |
| pET151TOPO+CorB_C121A                   | <i>corB_C121A</i>                                                                                                                                                                           | this work         |
| pET151TOPO+CorB_C121S                   | <i>corB_C121S</i>                                                                                                                                                                           | this work         |
| pET151TOPO+CorB_H264A                   | <i>corB_H264A</i>                                                                                                                                                                           | this work         |
| pET151TOPO+CorB_H264F                   | <i>corB_H264F</i>                                                                                                                                                                           | this work         |
| pET151TOPO+CorB_N292A                   | <i>corB_N292A</i>                                                                                                                                                                           | this work         |
| <i>E. coli</i> TFS-CorB                 | <i>corB</i>                                                                                                                                                                                 | this work         |
| <i>E. coli</i> TFS-CorB_C121A           | <i>corB_C121A</i>                                                                                                                                                                           | this work         |
| <i>E. coli</i> TFS-CorB_C121S           | <i>corB_C121S</i>                                                                                                                                                                           | this work         |
| <i>E. coli</i> TFS-CorB_H264A           | <i>corB_H264A</i>                                                                                                                                                                           | this work         |
| <i>E. coli</i> TFS-CorB_H264F           | <i>corB_H264F</i>                                                                                                                                                                           | this work         |
| <i>E. coli</i> TFS-CorB_N292A           | <i>corB_N292A</i>                                                                                                                                                                           | this work         |
